# Supplementary material for: Gallium fluoroarsenates
Source: Royal Society of Chemistry journal article supplement (doi:10.1039/c5dt01094b), 2015-01-01

## Supplementary Information

### Gallium fluoroarsenates

Keyleigh L. Marshall, Jennifer A. Armstrong and Mark T. Weller

Thermogravimetric analyses (TGA) were carried out on a Perking Elmer TGA 4000 with auto sampler.

Powder X-ray diffraction (PXRD) studies were carried out on a Siemens D5000 diffractometer operating Cu K $\alpha$  radiation ( $\lambda = 0.154$  nm) coupled to a scintillation counter detector. Samples were mounted on a silicate glass holder and scanned on a  $2\theta$  scale from 5-70° with a scan speed of 2° per minute at room temperature. Database searches were carried out on powder patterns obtained and phases identified were then compared with simulated patterns from single crystal data for GaAs and GaAsO<sub>4</sub>.

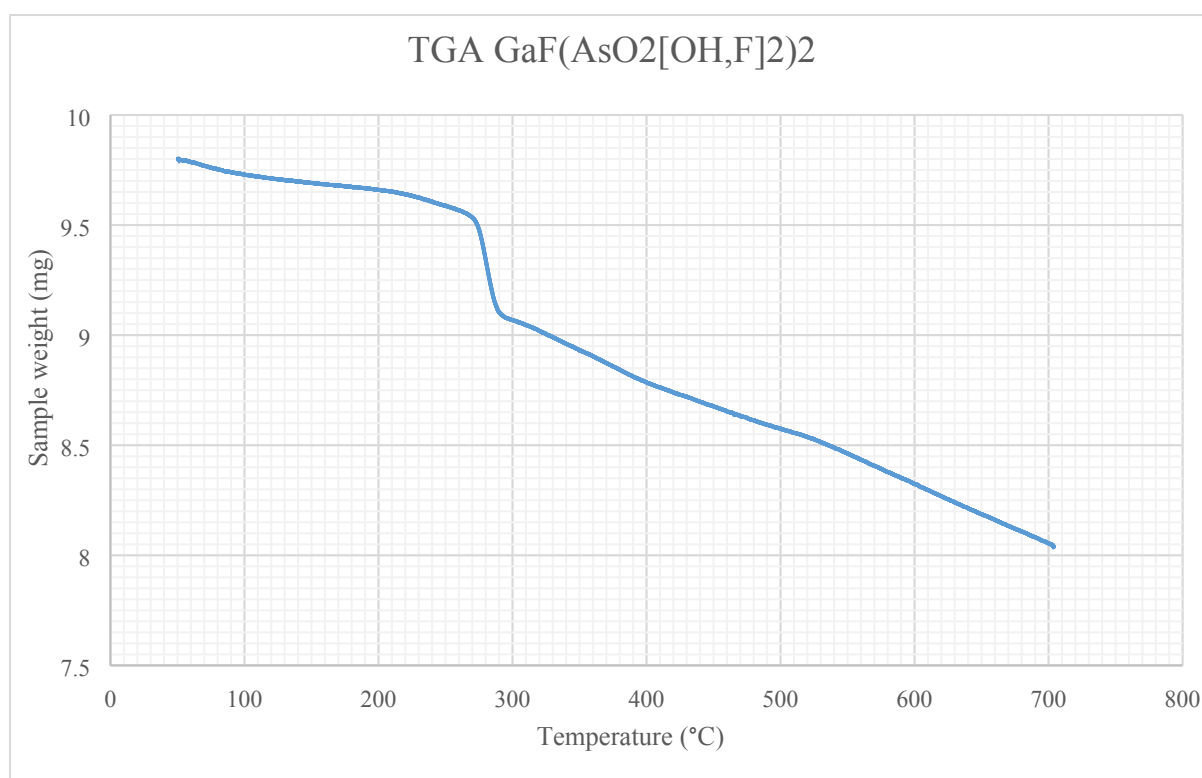

% by formula mass for each element:

| Ga%      | As%      | O%       | F%       |
|----------|----------|----------|----------|
| 18.41829 | 39.58336 | 16.90543 | 25.09292 |

% by mass loss at 270 °C: 4.593 %

% by mass loss overall (50-700 °C): 17.96 %

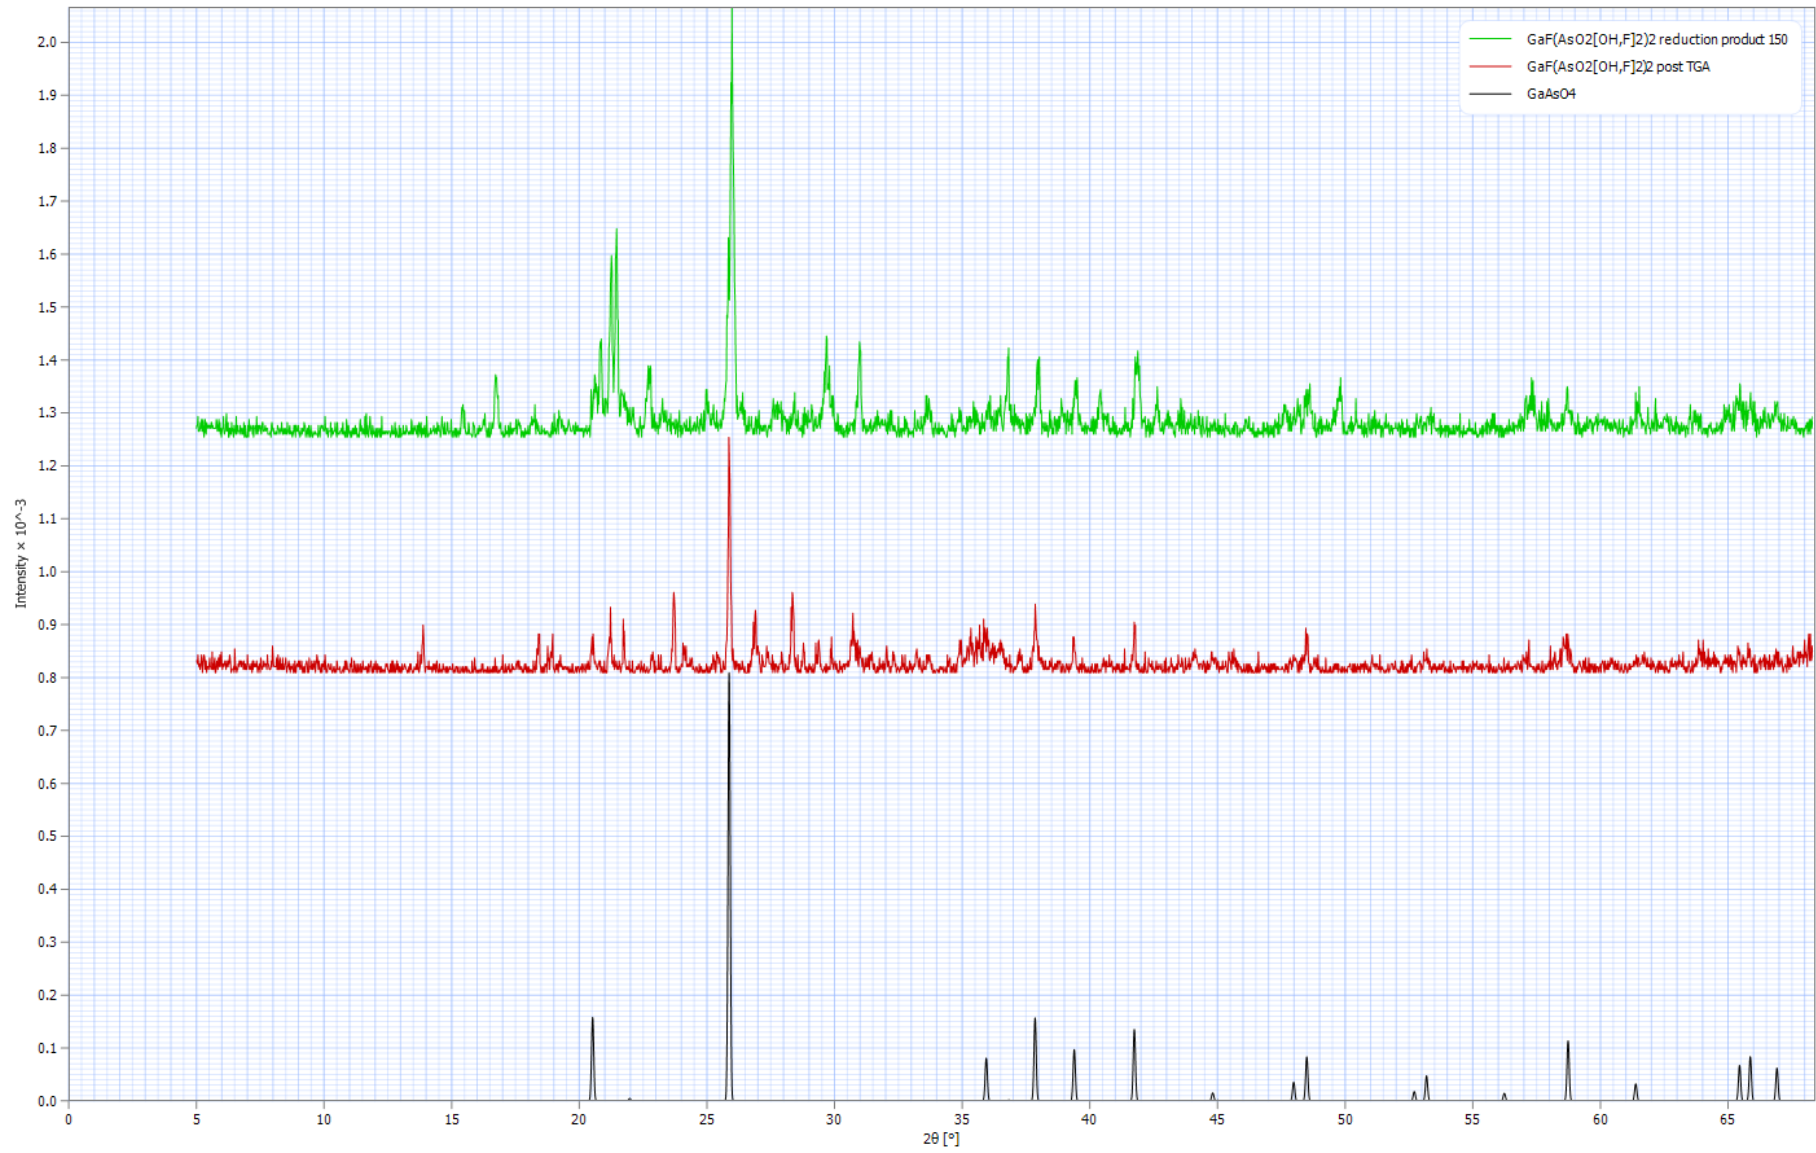

### TGA (NH<sub>4</sub>)<sub>3</sub>Ga<sub>4</sub>F<sub>9</sub>(AsO<sub>4</sub>)<sub>2</sub>

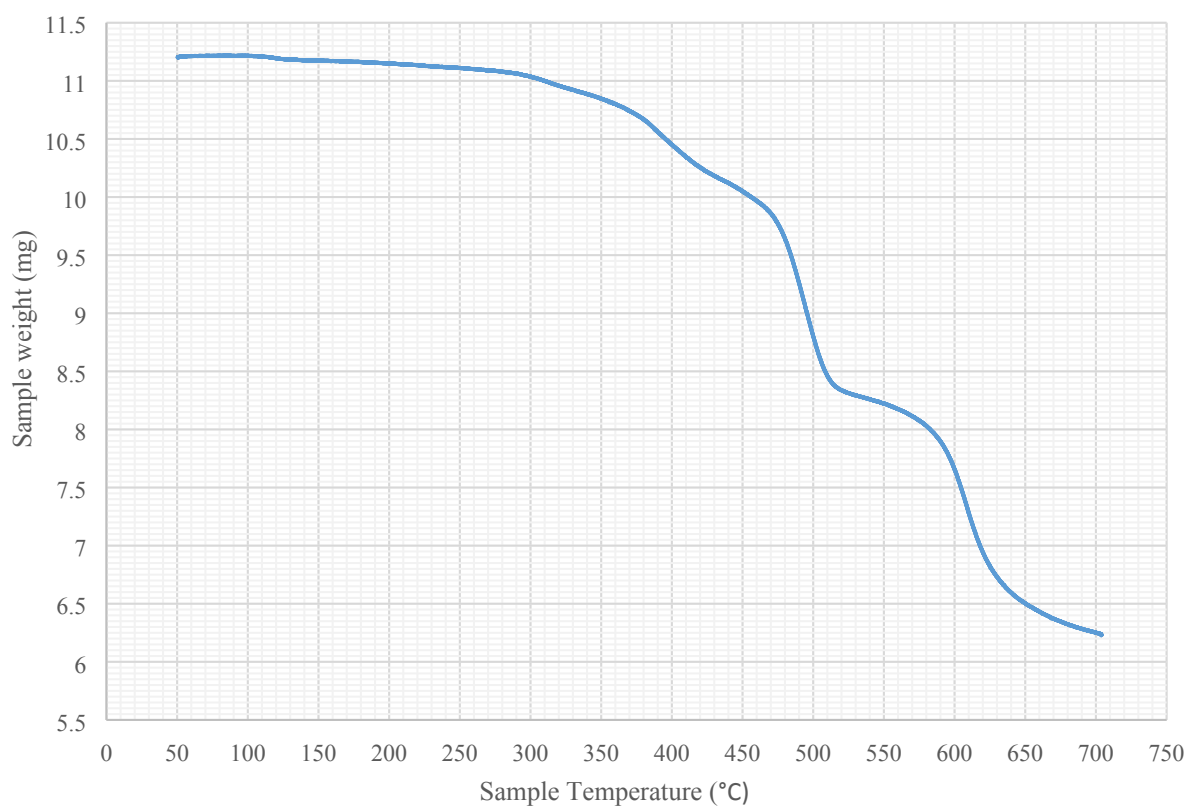

% by formula mass for each element:

| N%      | H%      | Ga%      | As%      | F%       | O%       |
|---------|---------|----------|----------|----------|----------|
| 5.37472 | 1.54561 | 35.67183 | 19.16588 | 21.86954 | 16.37089 |

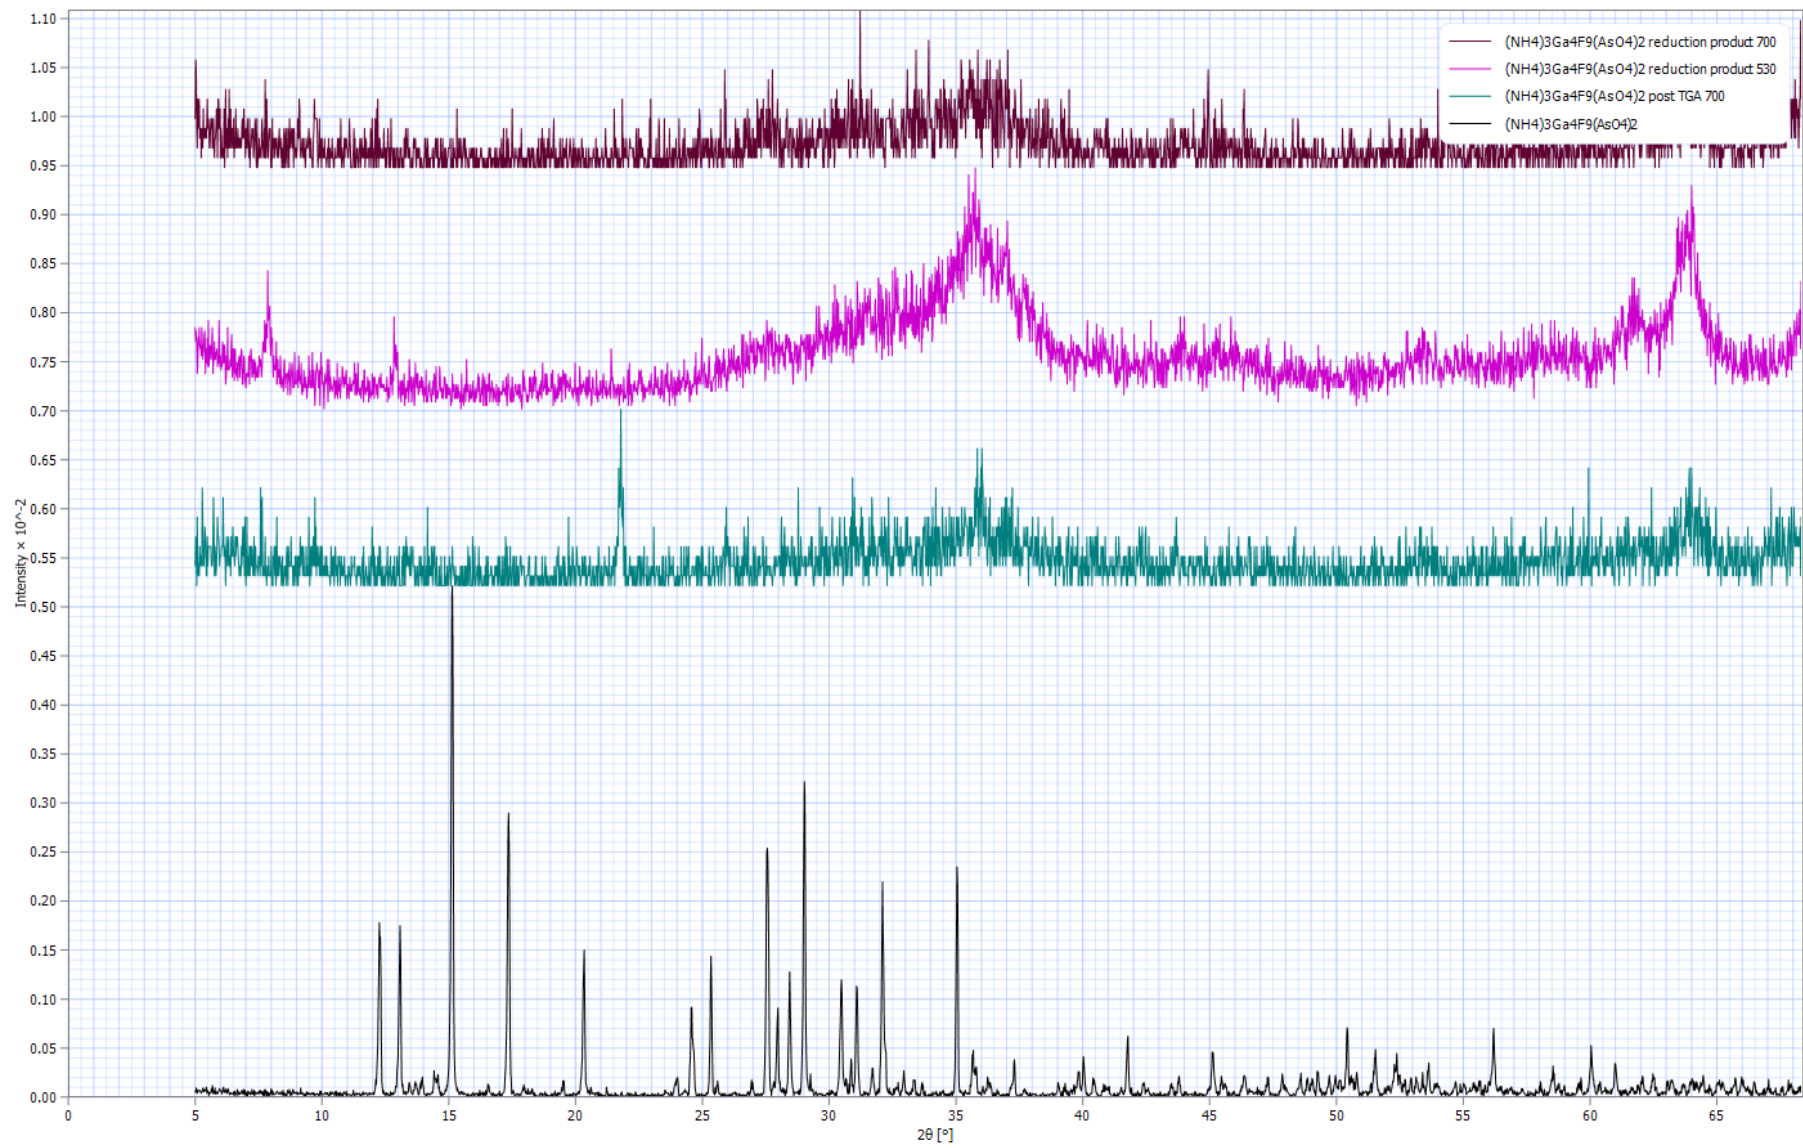

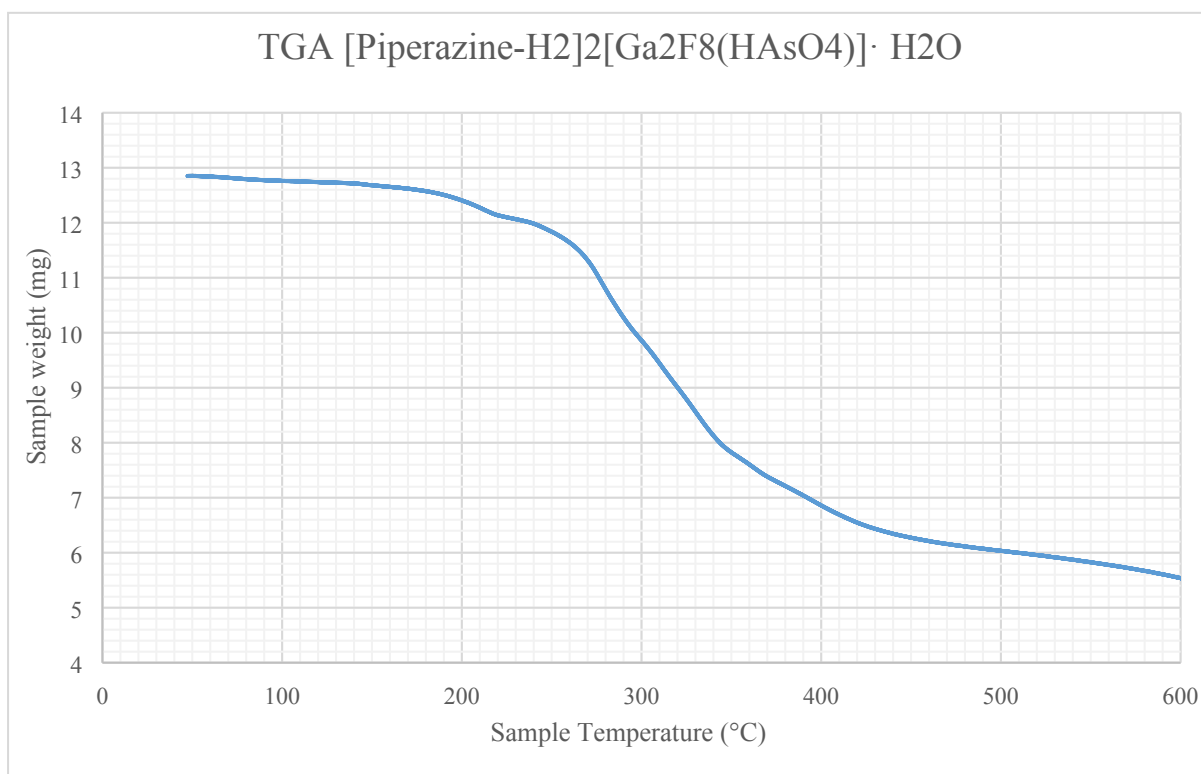

% by formula mass for each element:

| N%      | C%       | H%      | Ga%      | As%      | F%       | O%       |
|---------|----------|---------|----------|----------|----------|----------|
| 9.01330 | 15.45780 | 3.72594 | 22.43286 | 12.05280 | 24.44986 | 12.86890 |

% by mass loss overall (50-600 °C): 57.14 %

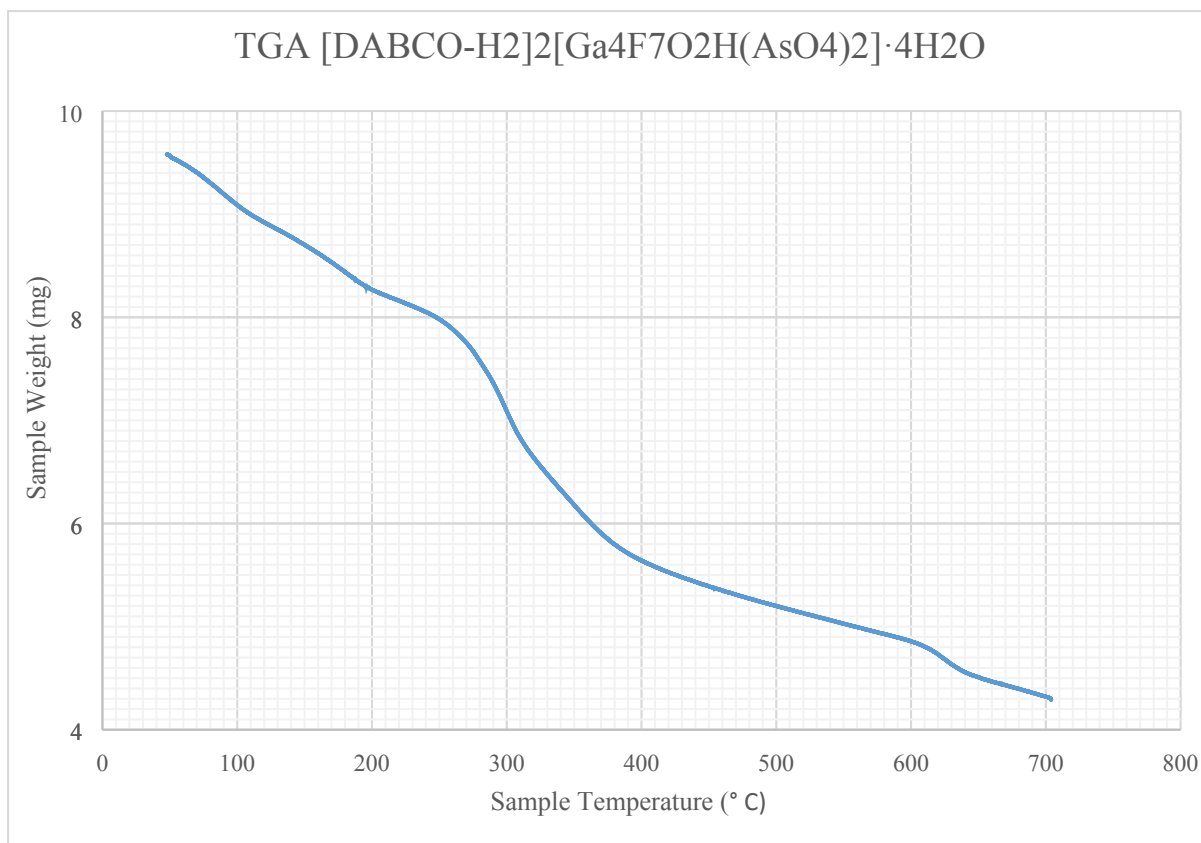

% by formula mass for each element:

| N%      | C%       | Ga%      | As%      | F%       | O%       | H%      |
|---------|----------|----------|----------|----------|----------|---------|
| 5.54160 | 14.25577 | 27.58458 | 14.82073 | 13.15335 | 22.15395 | 2.49000 |

% by mass loss overall (50-700 °C): 55.21 %

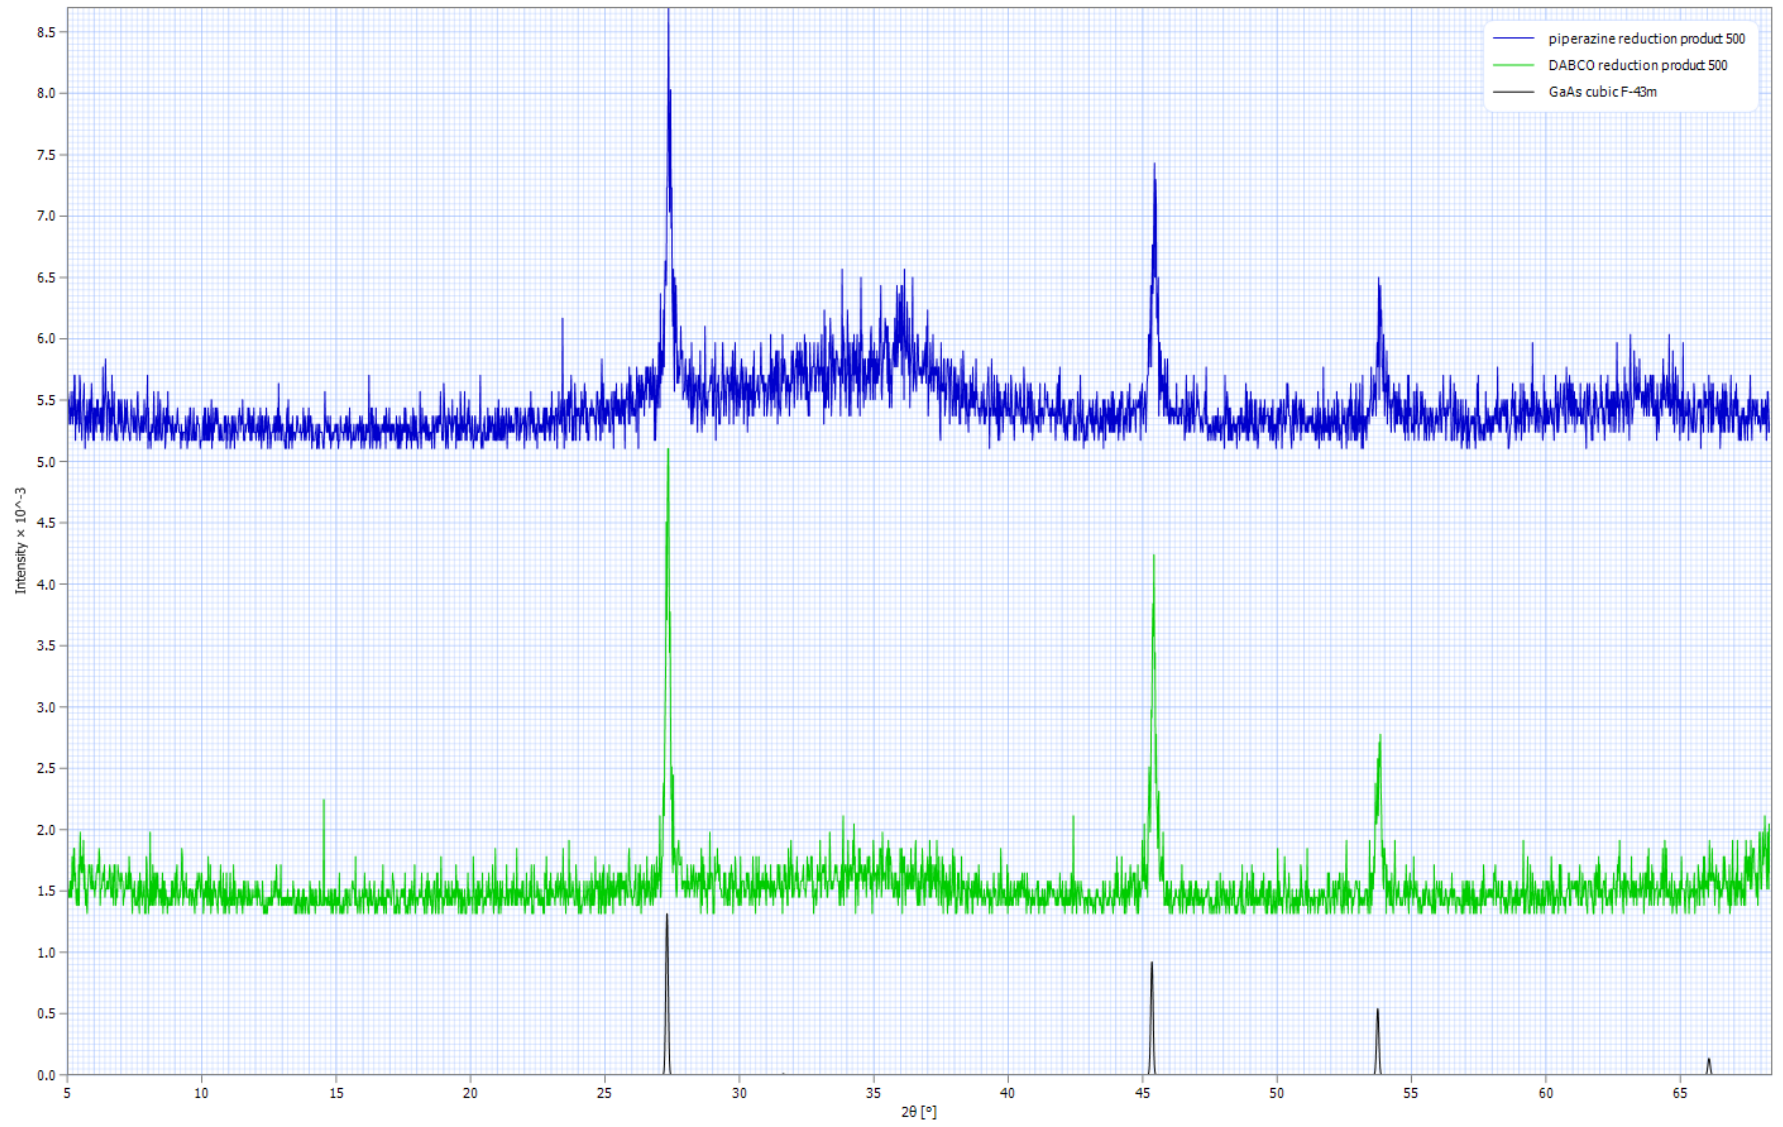

Supplement: c5dt01094b1.pdf [file c5dt01094b1.pdf]
